## Correction

# Correction: The Synthetic $\alpha$ -Bromo-2',3,4,4'-Tetramethoxychalcone ( $\alpha$ -Br-TMC) Inhibits the JAK/STAT Signaling Pathway

The *PLOS ONE* Staff

In Figure 5, some of the graphs are missing numbers on the y-axis. Please see the corrected Figure 5 [here](#).

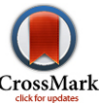

**Citation:** The *PLOS ONE* Staff (2014) Correction: The Synthetic  $\alpha$ -Bromo-2',3,4,4'-Tetramethoxychalcone ( $\alpha$ -Br-TMC) Inhibits the JAK/STAT Signaling Pathway. *PLoS ONE* 9(8): e105845. doi:10.1371/journal.pone.0105845

**Published:** August 8, 2014

**Copyright:** © 2014 The *PLOS ONE* Staff. This is an open-access article distributed under the terms of the Creative Commons Attribution License, which permits unrestricted use, distribution, and reproduction in any medium, provided the original author and source are credited.

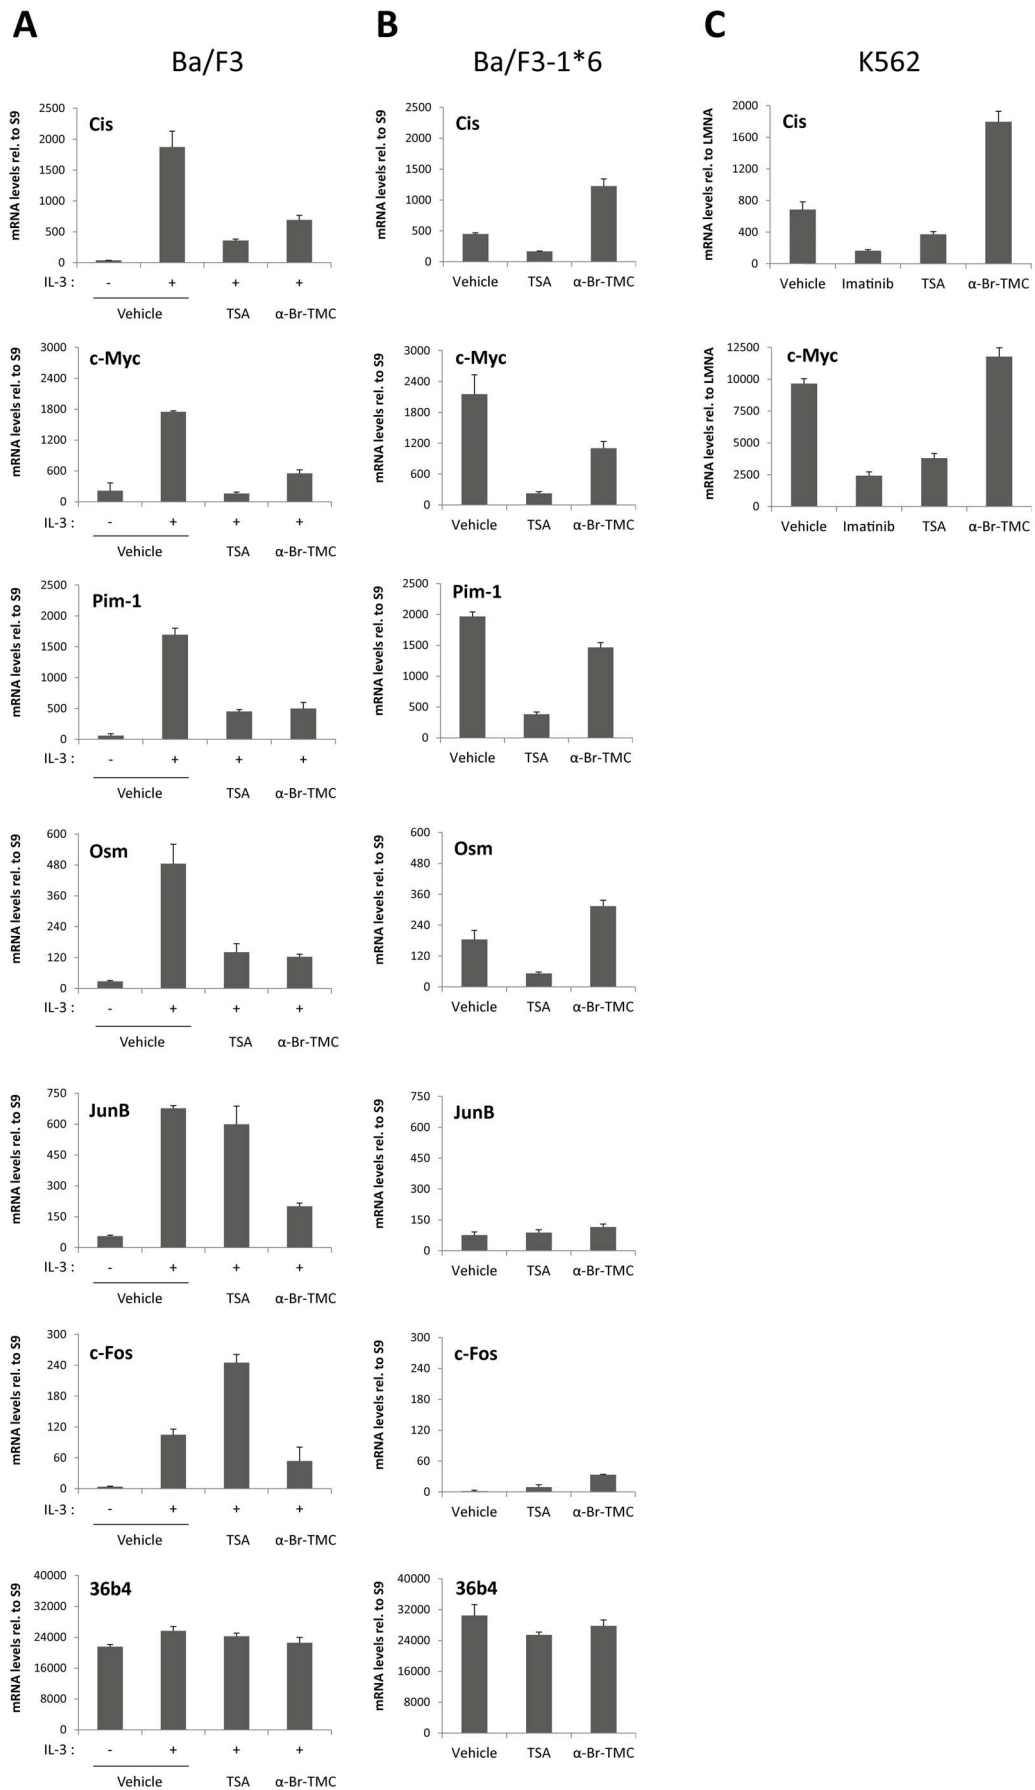

**Figure 5.  $\alpha$ -Br-TMC exerts distinct effects in normal and cancer cells.** Ba/F3 (A), its caSTAT5-transformed counterpart Ba/F3-1\*6 (B) and human leukemic K562 (C) cells were treated 90 minutes with 0.2  $\mu$ M TSA, 10  $\mu$ M  $\alpha$ -Br-TMC or 1  $\mu$ M Imatinib. Ba/F3 cells (A) were stimulated with 5 ng/mL IL-3 after an initial 30 minute drug pre-treatment (hence subjected to a 60 minute IL-3 stimulation). DMSO (vehicle) final concentration was adjusted to 0.02% in all conditions. Expression of STAT5-dependent (*Cis*, *Osm*, *c-Myc*, *Pim-1*) and -independent (*JunB*, *c-Fos*, *36b4*) genes was analyzed by quantitative RT-PCR. Gene expression data were normalized to mouse ribosomal S9 (A, B) or to human Lamin A/C (*LMNA*) (C) housekeeping gene-encoded mRNAs. (A, B) Normalized data are presented with adjusted Y-axis scale for a direct comparison of mRNA levels in the respective normal and transformed Ba/F3 and Ba/F3-1\*6 cell lines.  
doi:10.1371/journal.pone.0090275.g005

## Reference

1. Pinz S, Unser S, Brueggemann S, Besl E, Al-Rifai N, et al. (2014) The Synthetic  $\alpha$ -Bromo-2',3,4,4'-Tetramethoxychalcone ( $\alpha$ -Br-TMC) Inhibits the JAK/STAT Signaling Pathway. PLoS ONE 9(3): e90275. doi:10.1371/journal.pone.0090275
